# Supplementary material for: Adsorptive separation performance of 1-butanol onto typical hydrophobic zeolitic imidazolate frameworks (ZIFs)
Source: Royal Society of Chemistry journal article supplement (doi:10.1039/c6ce00249h), 2016-01-01
Supplement: c6ce00249h1.pdf [file c6ce00249h1.pdf]

### Supporting Information

#### **Adsorptive separation performance of 1-butanol onto typical hydrophobic zeolitic imidazolate frameworks (ZIFs)**

Chunping Gao,<sup>a</sup> Qi Shi,<sup>\*a</sup> and Jinxiang Dong<sup>\*a</sup>

<sup>a</sup> *Research Institute of Special Chemicals, Taiyuan University of Technology, Taiyuan, 030024,*

*Shanxi, PR China.*

*E-mail: [shiqi594@163.com](mailto:shiqi594@163.com), [dongjinxiaogwork@hotmail.com](mailto:dongjinxiaogwork@hotmail.com)*

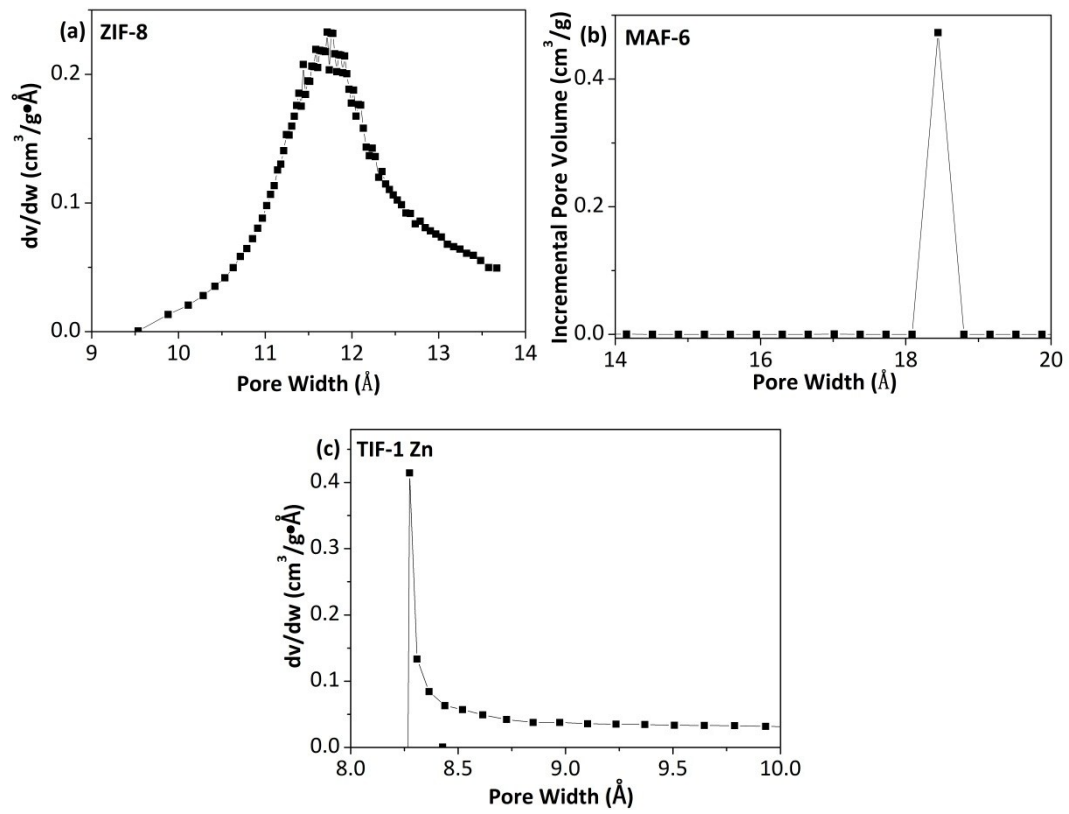

**Figure S1** Pore size distribution of the three hydrophobic materials-ZIF-8, MAF-6 and TIF-1 Zn.

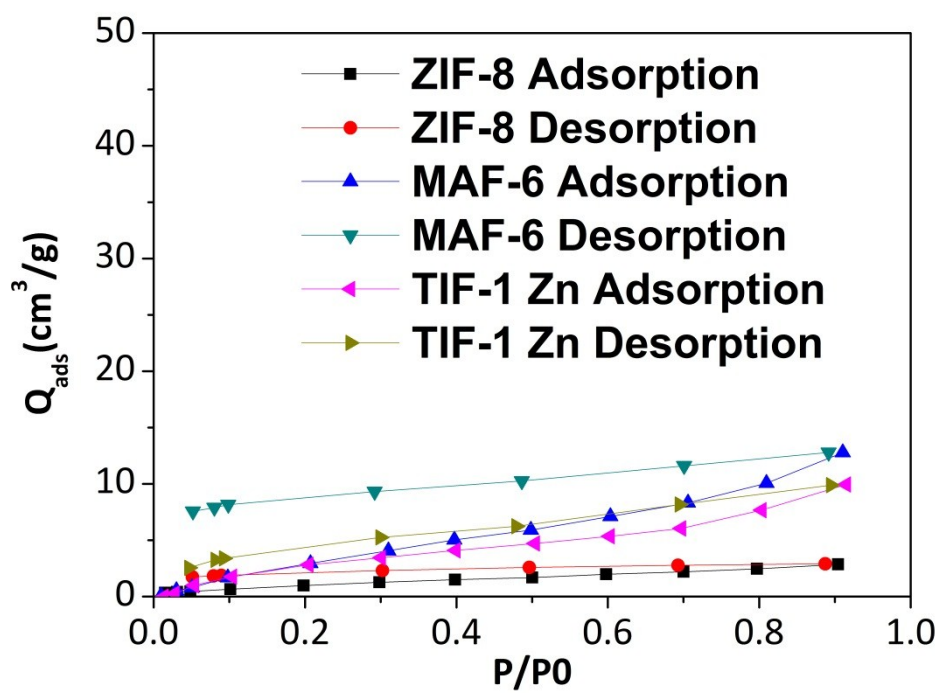

**Figure S2** Water vapor adsorption/desorption isotherm of three hydrophobic materials-ZIF-8, MAF-6 and TIF-1 Zn at 298 K.

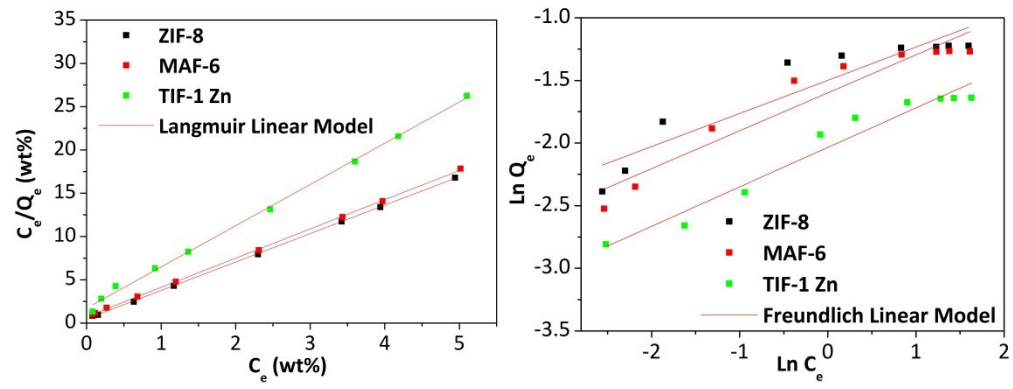

**Figure S3** (Left) Langmuir plots of the isotherms and (Right) Freundlich plots of the isotherms for 1-butanol adsorption over the three hydrophobic materials at 25 °C.

**Table S1** The adsorption constant of different adsorption models for 1-butanol onto the three hydrophobic materials at 25°C.

| Adsorbent | Langmuir isotherm model |             |         | Freundlich isotherm model |       |         |
|-----------|-------------------------|-------------|---------|---------------------------|-------|---------|
|           | $Q_{max}$ (g/g)         | $k$ (L/mol) | $R_1^2$ | $K_F$ (L/mol)             | $n$   | $R_2^2$ |
| ZIF-8     | 0.304                   | 6.708       | 0.999   | 0.223                     | 3.778 | 0.861   |
| MAF-6     | 0.287                   | 4.460       | 0.999   | 0.202                     | 3.302 | 0.911   |
| TIF-1 Zn  | 0.199                   | 2.760       | 0.998   | 0.131                     | 3.170 | 0.951   |

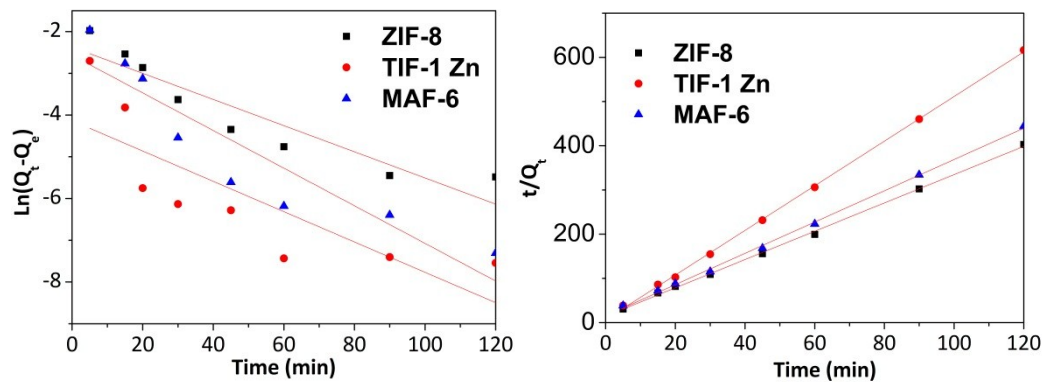

**Figure S4** (Left) The pseudo-first-order and (Right) pseudo-second-order kinetic model of 1-butanol onto the three hydrophobic ZIFs at 25°C.

**Table S2** The kinetic parameters for adsorption of 1-butanol onto the three hydrophobic ZIFs at 25 °C.

| Adsorbent | Pseudo-first-order kinetic model |                   |         | Pseudo-second-order kinetic model |                  |                  |         |
|-----------|----------------------------------|-------------------|---------|-----------------------------------|------------------|------------------|---------|
|           | $K_1$                            | $Q_{e,cal} (g/g)$ | $R_1^2$ | $K_2 (g/g \cdot min)$             | $Q_{e,exp}(g/g)$ | $Q_{e,cal}(g/g)$ | $R_2^2$ |
| ZIF-8     | 0.031                            | 0.093             | 0.853   | 0.706                             | 0.294            | 0.302            | 0.999   |
| MAF-6     | 0.045                            | 0.077             | 0.833   | 0.822                             | 0.282            | 0.275            | 0.998   |
| TIF-1 Zn  | 0.036                            | 0.016             | 0.610   | 3.860                             | 0.198            | 0.194            | 0.999   |

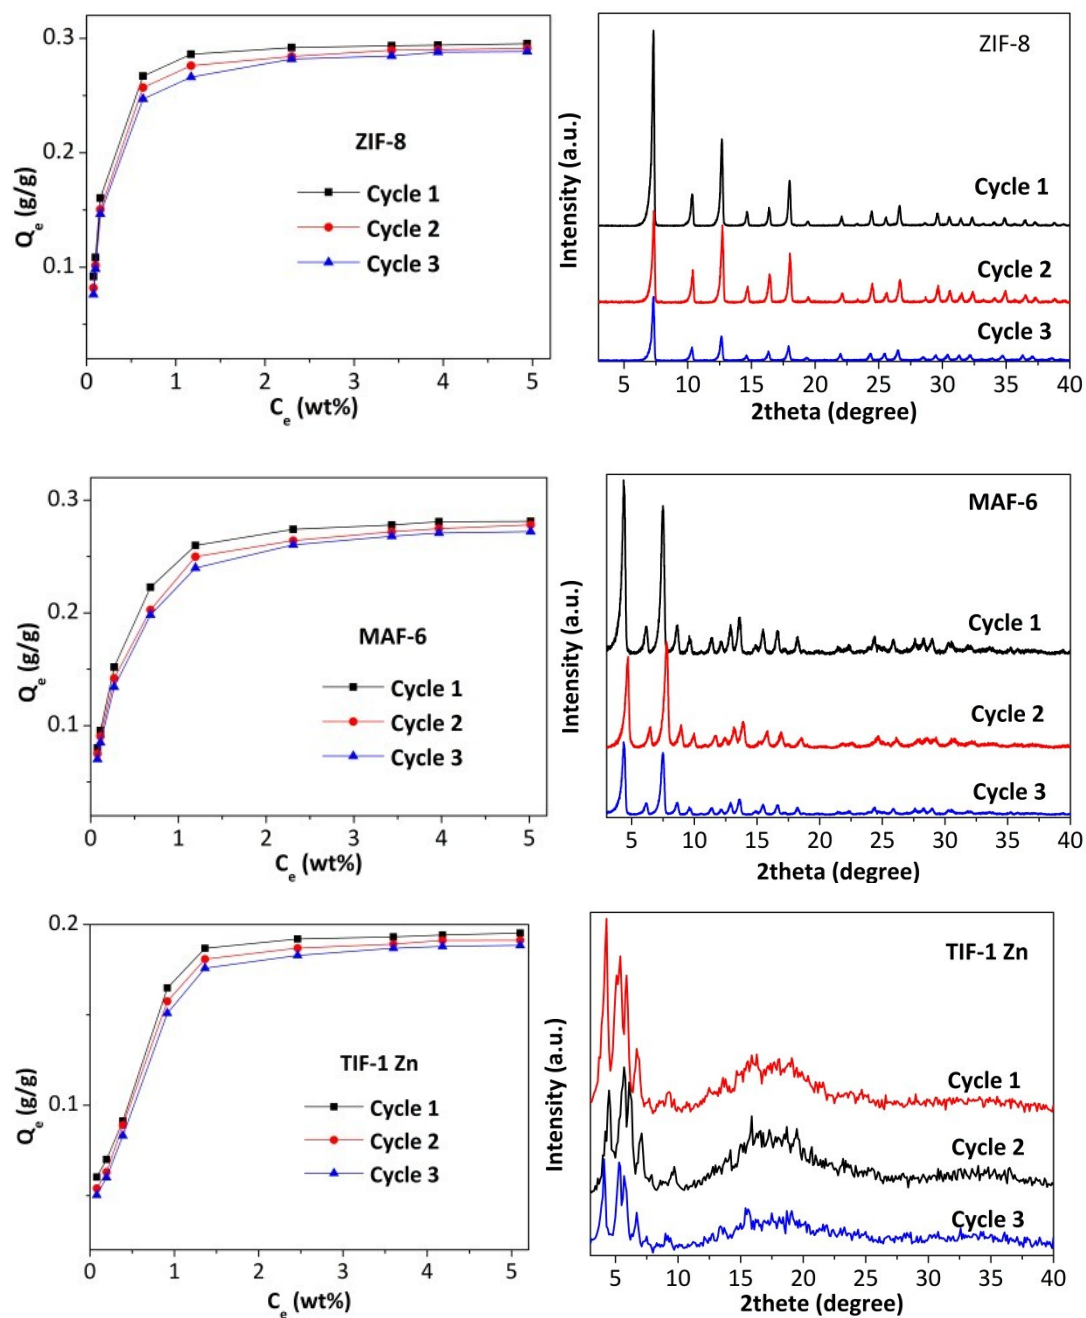

**Figure S5** (Left) Cycle curves for 1-butanol adsorption isotherm onto the three hydrophobic materials (Right) show PXRD of ZIFs materials before and after adsorption at 25 °C and the sample was regenerated for 2h at 250 °C.



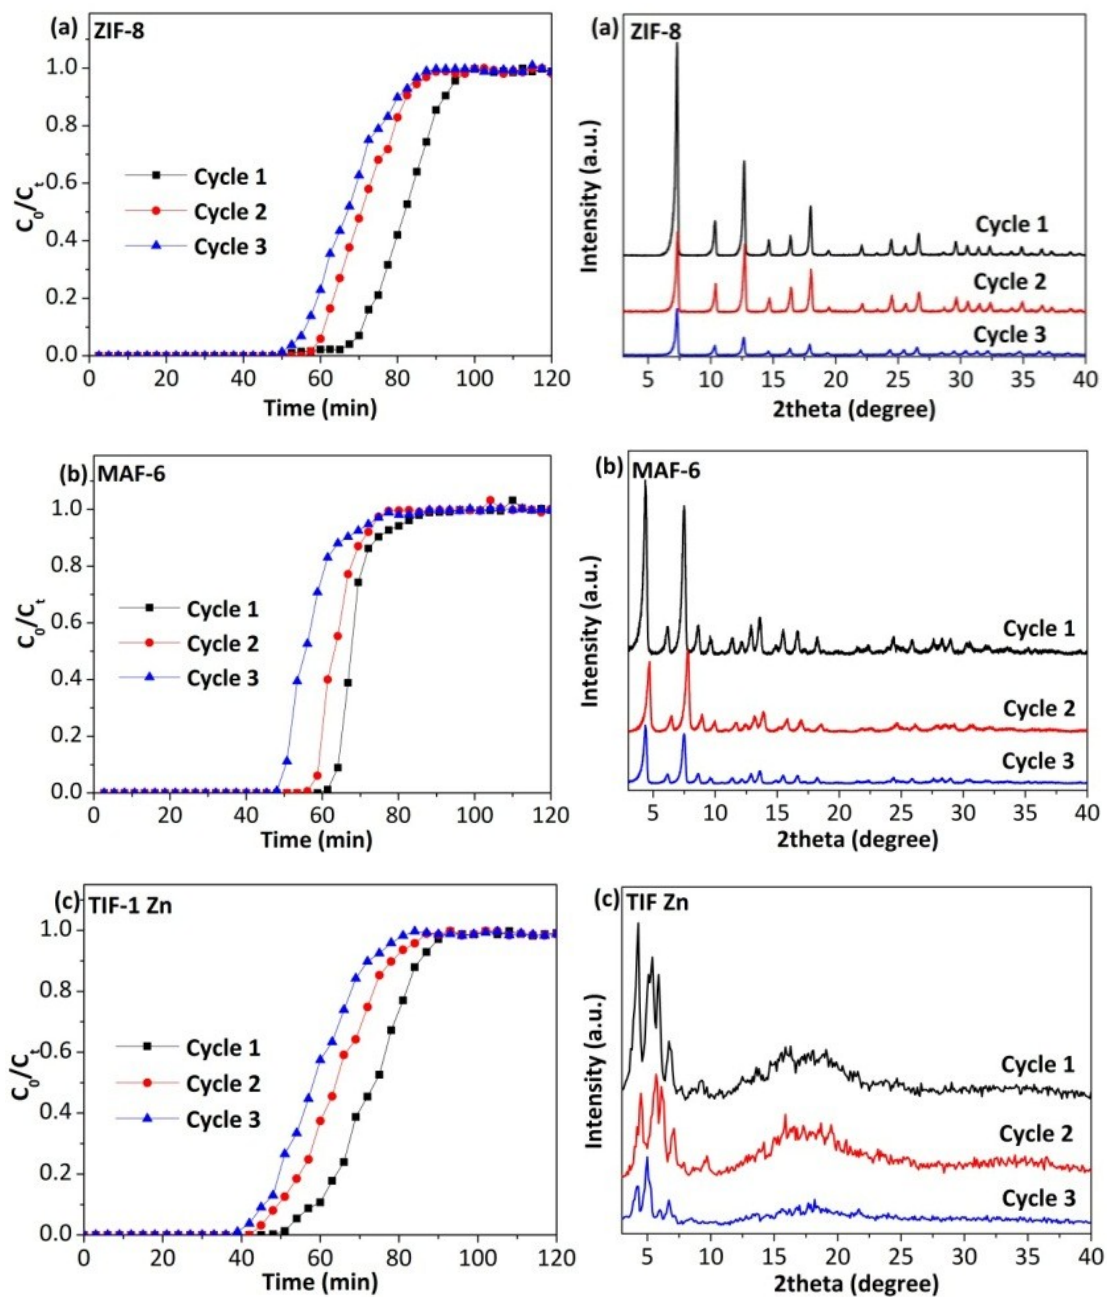

**Figure S6** (Left) Cycle curves for 1-butanol breakthrough onto ZIF-8, MAF-6 and TIF-1 Zn packed column and (Right) show PXRD of ZIFs materials before and after adsorption at 25 °C and the sample was regenerated for 2h at 250 °C.

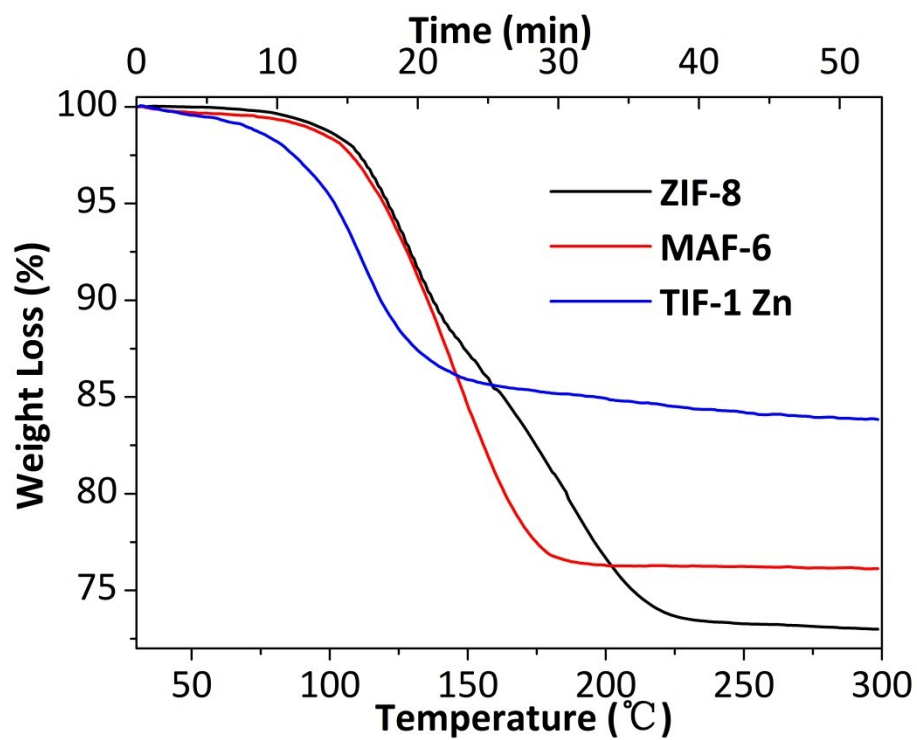

**Figure S7** The 1-butanol desorption data of three hydrophobic materials-ZIF-8, MAF-6 and TIF-1 Zn.
